# Supplementary material for: Investigation of Dengue Infection in Asymptomatic Individuals during a Recent Outbreak in La Réunion
Source: MDPI journal article supplement (doi:10.3390/v15030742), 2023-03-14
Supplement: s1 [file s1]

Table S1. Description and frequency of symptoms declared by the 48 dengue RT-PCR confirmed study subjects

|                |                  |          | n  | Dengue RT-PCR positive study subjects, N = 48 |
|----------------|------------------|----------|----|-----------------------------------------------|
| FATIGUE        | Frequency        |          | 47 | <b>47/48 (98%)</b>                            |
|                | Grade            | mild     |    | 3/47 (6%)                                     |
|                |                  | moderate |    | 9/47 (19%)                                    |
|                |                  | severe   |    | 35/47 (74%)                                   |
|                | Duration [days]* |          | 24 | <b>11 (8); 10 [9]</b>                         |
| FEVER          | Frequency        |          | 46 | <b>46/48 (95%)</b>                            |
|                | Grade            | mild     |    | 1/46 (2%)                                     |
|                |                  | moderate |    | 14/46 (20%)                                   |
|                |                  | severe   |    | 31/46 (67%)                                   |
|                | Duration [days]* |          | 38 | 5.4 (3.2); 5.0 [3.8]                          |
| ANOREXIA       | Frequency        |          |    | <b>39/48 (81%)</b>                            |
|                | Frequency        |          |    | <b>35/48 (73%)</b>                            |
| HEADACHE       |                  |          | 35 |                                               |
|                | Grade            | mild     |    | 9/35 (26%)                                    |
|                |                  | moderate |    | 6/35 (17%)                                    |
|                |                  | severe   |    | 20/35 (57%)                                   |
|                | Duration [days]* |          | 21 | 4.3 (4.0); 3.0 [2.0]                          |
| MYALGIA        | Frequency        |          | 35 | <b>35/48 (73%)</b>                            |
|                | Grade            | mild     |    | 1/35 (3%)                                     |
|                |                  | moderate |    | 11/35 (31%)                                   |
|                |                  | severe   |    | 23/35 (66%)                                   |
|                | Duration [days]* |          | 23 | 5.57 (3.10); 5.00 [4.00]                      |
| ARTHRALGIA     | Frequency        |          | 20 | <b>28/48 (58%)</b>                            |
|                | Duration         |          |    | 6.2 (3.0); 6.0 [4.2]                          |
|                |                  | Diffuse  |    | 25/28 (89%)                                   |
|                |                  |          | 25 |                                               |
|                | Grade            | mild     |    | 2/25 (8%)                                     |
|                |                  | moderate |    | 6/25 (24%)                                    |
|                |                  | severe   |    | 17/25 (68%)                                   |
| DIZZINESS      | Frequency        |          | 28 | <b>28/48 (58%)</b>                            |
|                | Grade            | mild     |    | 11/28 (39%)                                   |
|                |                  | moderate |    | 9/28 (32%)                                    |
|                |                  | severe   |    | 8/28 (28%)                                    |
|                | Duration [days]* |          | 20 | 3.30 (2.66); 2.50 [3.25]                      |
| PRURITIS       | Frequency        |          | 27 | <b>27/48 (56%)</b>                            |
|                | Grade            | mild     |    | 6/27 (22%)                                    |
|                |                  | moderate |    | 7/27 (26%)                                    |
|                |                  | severe   |    | 14/27 (52%)                                   |
|                | Duration [days]* |          | 17 | 4.1 (3.1); 3.0 [6.0]                          |
| DIARRHEA       | Frequency        |          | 24 | <b>24/48 (50%)</b>                            |
|                | Grade            | mild     |    | 6/24 (25%)                                    |
|                |                  | moderate |    | 10/24 (42%)                                   |
|                |                  | severe   |    | 8/24 (33%)                                    |
|                | Duration [days]* |          | 19 | 3.0 (3.8); 2.0 [3.0]                          |
| RASH           | Frequency        |          | 22 | <b>22/48 (46%)</b>                            |
|                | Grade            | mild     |    | 2/22 (9%)                                     |
|                |                  | moderate |    | 11/22 (50%)                                   |
|                |                  | severe   |    | 9/22 (41%)                                    |
|                | Duration [days]* |          | 11 | 5.6 (5.8); 5.0 [5.0]                          |
| VOMITTING      | Frequency        |          | 19 | <b>19/48 (40%)</b>                            |
|                | Grade            | mild     |    | 10/19 (53%)                                   |
|                |                  | moderate |    | 3/19 (16%)                                    |
|                |                  | severe   |    | 6/19 (32%)                                    |
|                | Duration [days]* |          | 16 | 2.50 (2.71); 1.50 [4.25]                      |
| ABDOMINAL PAIN | Frequency        |          | 17 | <b>17/48 (35%)</b>                            |
|                | Grade            | mild     |    | 3/17 (18%)                                    |
|                |                  | moderate |    | 9/17 (53%)                                    |
|                |                  | severe   |    | 5/17 (29%)                                    |
|                | Duration [days]* |          | 14 | 3.6 (3.6); 3.0 [2.5]                          |

|                           |                  |          |                            |
|---------------------------|------------------|----------|----------------------------|
| <b>RETRO-ORBITAL PAIN</b> | Frequency        |          | <b>17/48 (35%)</b>         |
|                           |                  |          | 17                         |
|                           | Grade            | mild     | 2/17 (12%)                 |
|                           |                  | moderate | 5/17 (29%)                 |
|                           |                  | severe   | 10/17 (59%)                |
|                           | Duration [days]* |          | 10 6 (5); 4 [2]            |
| <b>SORE THROAT</b>        | Frequency        |          | <b>9/48 (19%)</b>          |
|                           |                  |          | 9                          |
|                           | Grade            | mild     | 2/9 (22%)                  |
|                           |                  | moderate | 4/9 (44%)                  |
|                           |                  | severe   | 3/9 (33%)                  |
|                           | Duration [days]* |          | 5 4.00 (1.22); 4.00 [1.00] |
| <b>DYSPNEA</b>            | Frequency        |          | 7/48 (15%)                 |
| <b>HEART FLUTTER</b>      | Frequency        |          | 6/48 (13%)                 |
| <b>COUGH</b>              | Frequency        |          | 5/48 (10%)                 |
| <b>CHEST PAIN</b>         | Frequency        |          | 4/48 (8%)                  |
| <b>BLEEDING GUMS</b>      | Frequency        |          | 4/48 (8%)                  |
| <b>EPISTAXIS</b>          | Frequency        |          | 4/48 (8%)                  |
| <b>RHINORHEA</b>          | Frequency        |          | 4/48 (8%)                  |
| <b>ALTERED TASTE</b>      | Frequency        |          | 3/48 (6%)                  |
| <b>CONJUNCTIVITE</b>      | Frequency        |          | 3/48 (6%)                  |
| <b>MELENA</b>             | Frequency        |          | 2/48 (4%)                  |
| <b>HEMATEMESIS</b>        | Frequency        |          | 1/48 (2%)                  |
| <b>HEMATURIA</b>          | Frequency        |          | 1/48 (2%)                  |
| <b>BLOOD IN STOOL</b>     | Frequency        |          | 1/48 (2%)                  |

\* Mean (SD); Median [IQR]
